# Supplementary material for: Hamster organotypic modeling of SARS-CoV-2 lung and brainstem infection
Source: PubMed Central journal article supplement (PMC8490365; doi:10.1038/s41467-021-26096-z), 2021-10-04
Supplement: 41467_2021_26096_MOESM1_ESM.pdf [file 41467_2021_26096_MOESM1_ESM.pdf]

## Supplementary information

### Hamster organotypic modeling of SARS-CoV-2 lung and brainstem infection

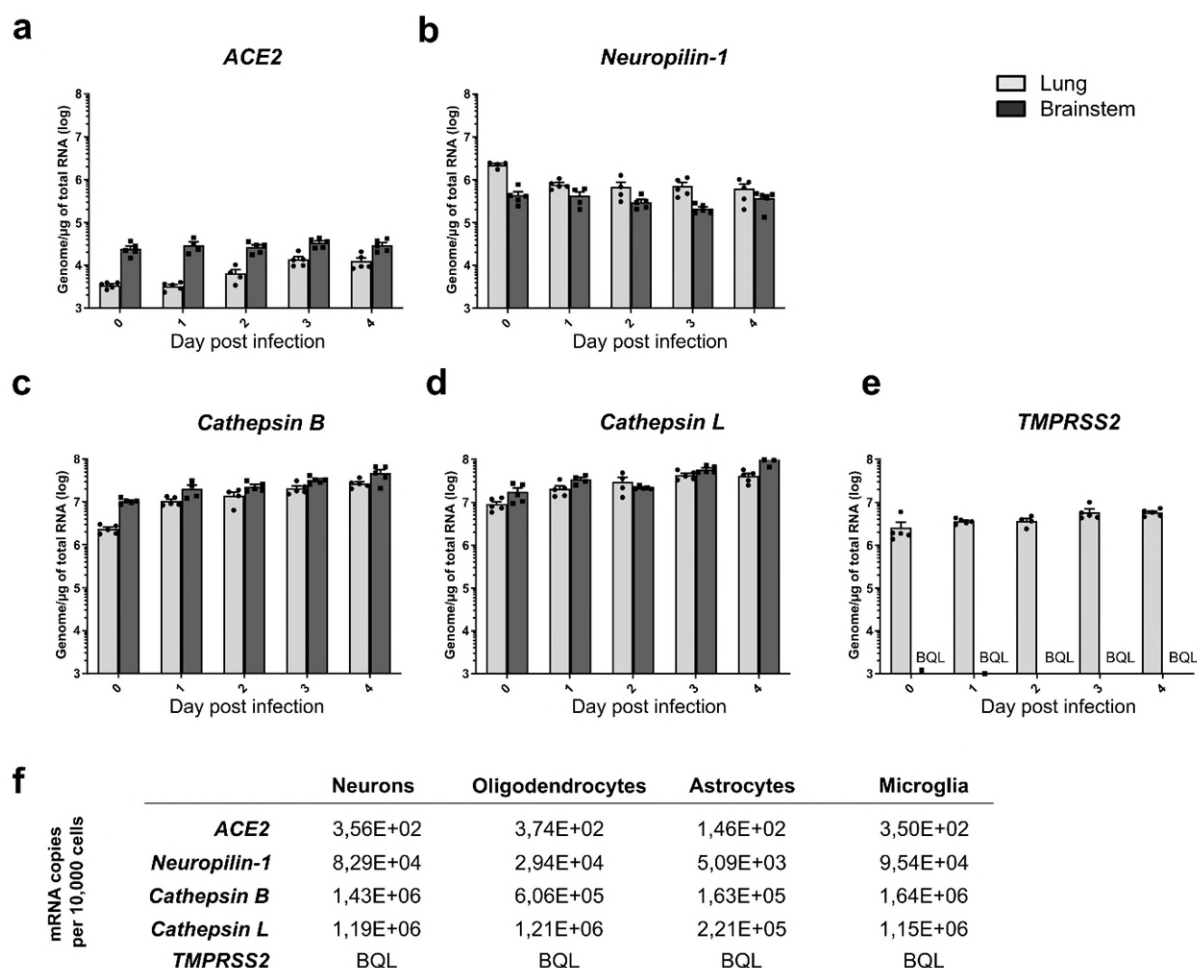

#### Supplementary figure 1. Characterization of the mRNA expression of ACE2, Neuropilin and serine proteases in organotypic cultures.

**a,b,c,d,e**, ACE2, Neuropilin-1 and serine protease mRNA expression quantified by RT-qPCR in organotypic cultures infected with 1,000 PFU of SARS-CoV-2. n= minimum 4 biologically independent animals over 2 independent experiments. **f**, Neurons, oligodendrocytes, astrocytes and microglia from non-infected cerebellar cultures at day 0 were sorted by fluorescence-activated single cell sorting using respectively anti-gaba-A receptor, anti-GalC, anti-GLAST and anti-CD68 antibodies. ACE2, Neuropilin-1 and serine proteases mRNA copies/10<sup>4</sup> cells were quantified by RT-qPCR in each cell populations. BQL: below quantification limit; ACE2: Angiotensin-converting enzyme 2; PTFE: Polytetrafluoroethylene; GalC: Galactosylceramidase. Error bars represent SD. Source data are provided as a Source Data file.

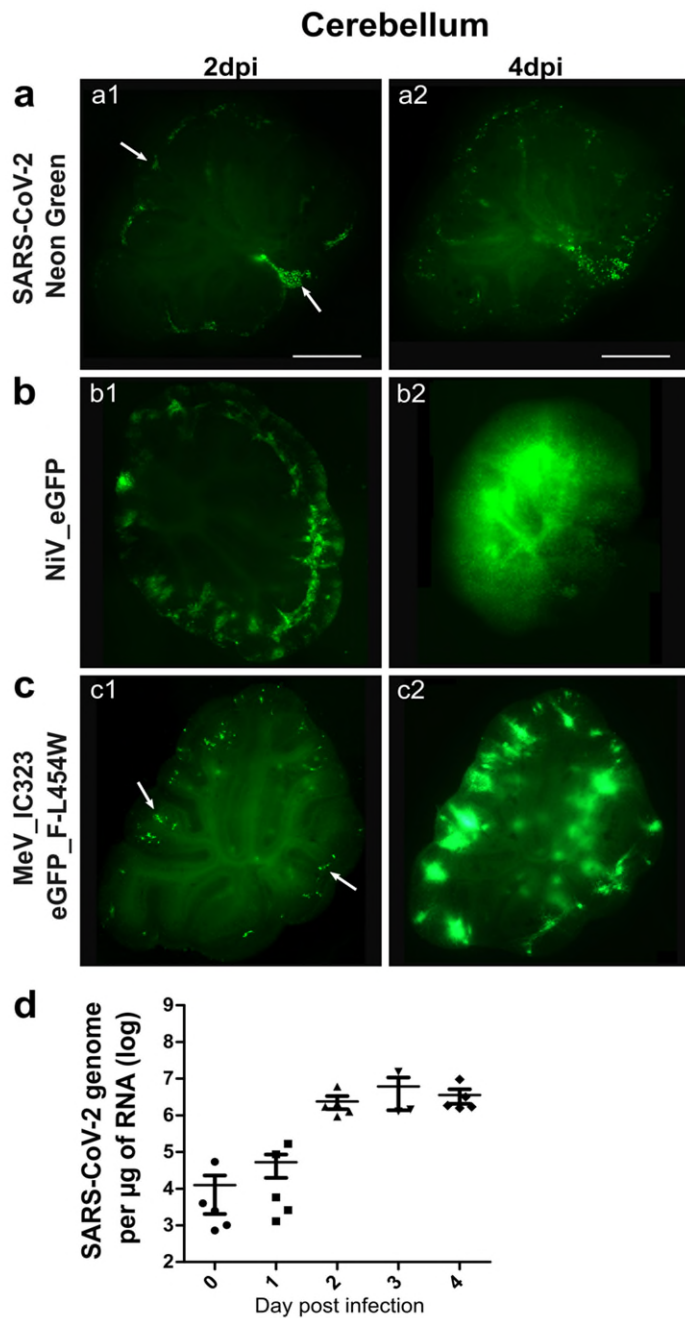

**Supplementary figure 2. Dissemination of three respiratory viruses including SARS-CoV-2 in hamster organotypic cerebellar cultures.**

Comparative entry and spread of 3 different respiratory viruses showing encephalitic properties: **a**, icSARS-CoV-2-mNG (infection: 10,000 pfu), **b**, NiV-EGFP (infection: 5,000 pfu) and **c**, the hyperfusogenic variant MeV IC323-EGFP-F L454W (infection: 1000 pfu) were monitored by following the fluorescence at 2 dpi and 4 dpi in cerebellum slices. Pictures were taken using a Nikon Eclipse Ts2R microscope, reconstituted using the Stitching plug-in with ImageJ software (Preibisch et al., 2009) and are representative of 3 independent experiments. Scale bar = 1 mm. **d**, SARS-CoV-2 genomes per  $\mu\text{g}$  of total RNA were quantified by RT-qPCR in cerebellum organotypic cultures (n=5 biologically independent animals) at 90min post infection and 1, 2, 3 and 4 days post infection (dpi) with 5,000 pfu and normalized to the standard deviation for GAPDH mRNA. Source data are provided as a Source Data file.

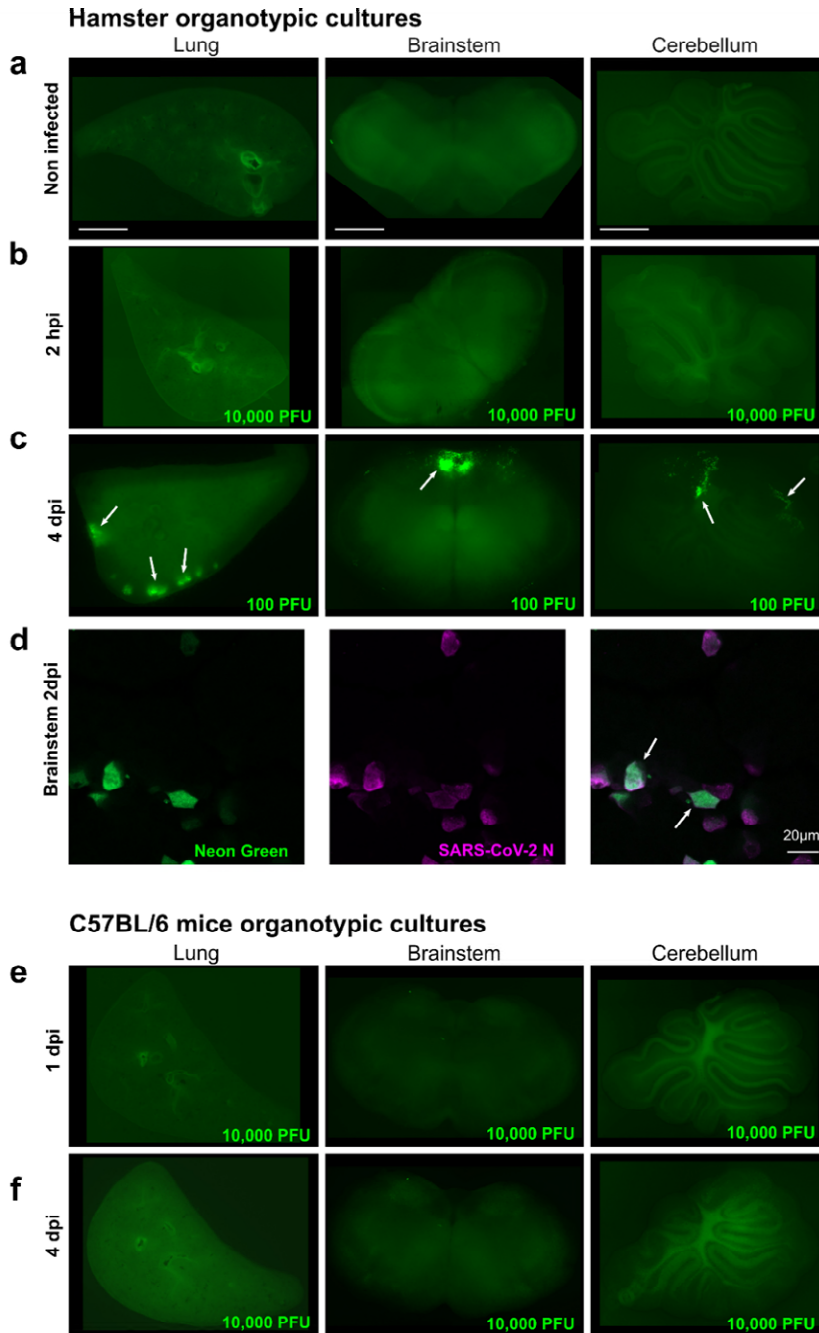

**Supplementary figure 3. Controls for the viral dissemination and the basal autofluorescence in SARS-CoV-2 infected and non-infected hamster and mice organotypic cultures.**

Pictures of hamster organotypic cultures from lungs, brainstems and cerebella were taken **a**, 2 hours post contact with a vehicle (non-infected), **b**, 2 hours post infection (hpi) with 10,000 PFU of icSARS-CoV-2-mNG, and **c**, 4 days post infection (dpi) with 100 PFU of icSARS-CoV-2-mNG. **d**, Brainstem organotypic cultures were infected with 1000 PFU with icSARS-CoV-2-mNG and collected at 2 dpi. Immunofluorescent staining shows colocalization of Neon-green expressing cells and SARS-CoV-2 nucleoprotein (N) positive cells. **e,f**, C57BL/6 mice organotypic cultures from lungs, brainstems and cerebella were infected with 10,000 PFU of icSARS-CoV-2-mNG and viral entry was monitored by following the fluorescence at 1 dpi and 4 dpi. Pictures from **a,b,c,e,f**, were taken using a Nikon Eclipse Ts2R microscope and reconstituted using the Stitching plug-in with ImageJ software (Preibisch et al., 2009). Scale bar = 1 mm. The immunofluorescence staining analysis showed in **d**, was performed using a LSM800 confocal microscope from Zeiss. All images are representative of 3 independent experiments.

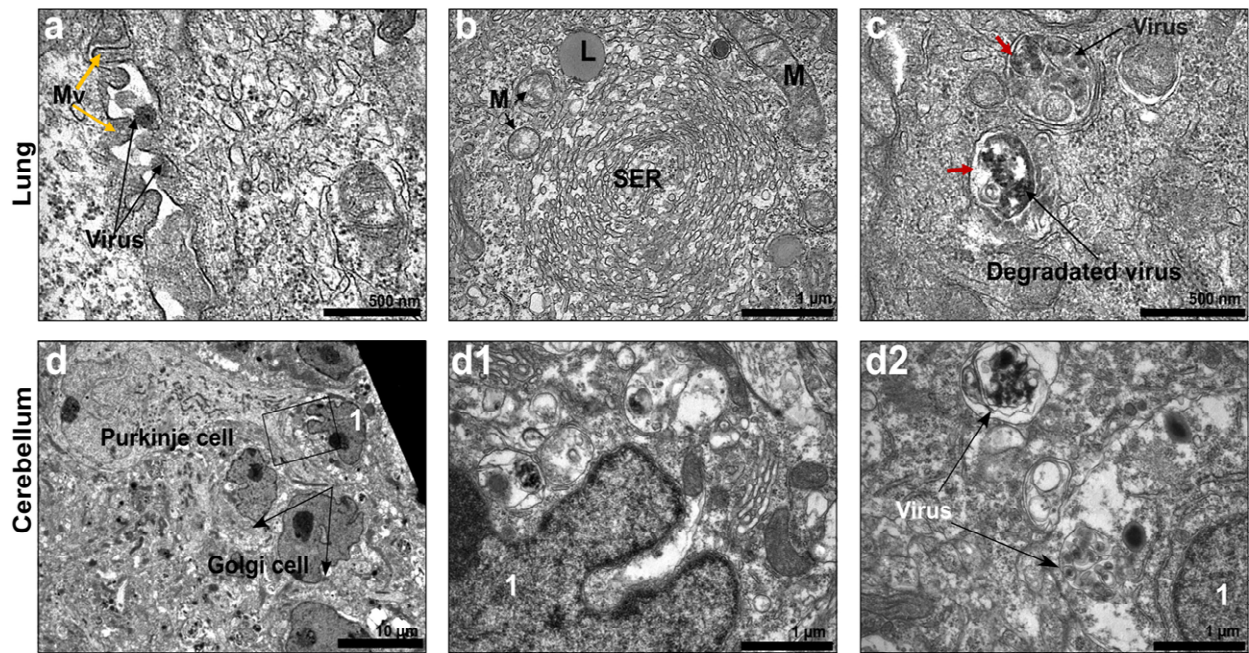

**Supplementary figure 4. SARS-CoV-2 tropism in hamster organotypic lung and cerebellum cultures 1 and 2 days after infection.**

Cultures were infected with 1,000 pfu of SARS-CoV-2 and fixed at 1 day post infection (organotypic lung cultures) or 2 days post infection (organotypic cerebellum cultures).

**a,b,c,** Ultrastructure of infected lung cells by transmission electron microscopy (TEM). **a,** High magnification of a type 2 pneumocytes apical surface with viral particles on the microvillus (Mv). **b,** Cytoplasm of a lung cell showing disorganization of the smooth endoplasmic reticulum (SER), the presence of lipid and mitochondria undergoing degradation. **c,** High magnification of the cytoplasm of a ciliated cell with several autophagosomes containing virions (arrows). Red arrows show the double membrane of the autophagosome. All images are representative of 2 independent experiments.

**d,** TEM analysis of cerebellum culture showing infected Golgi neurons close to an uninfected Purkinje neuron. **d1,2,** Enlargement of a Golgi neuron showing autophagosomes that contain viral particles (arrows).

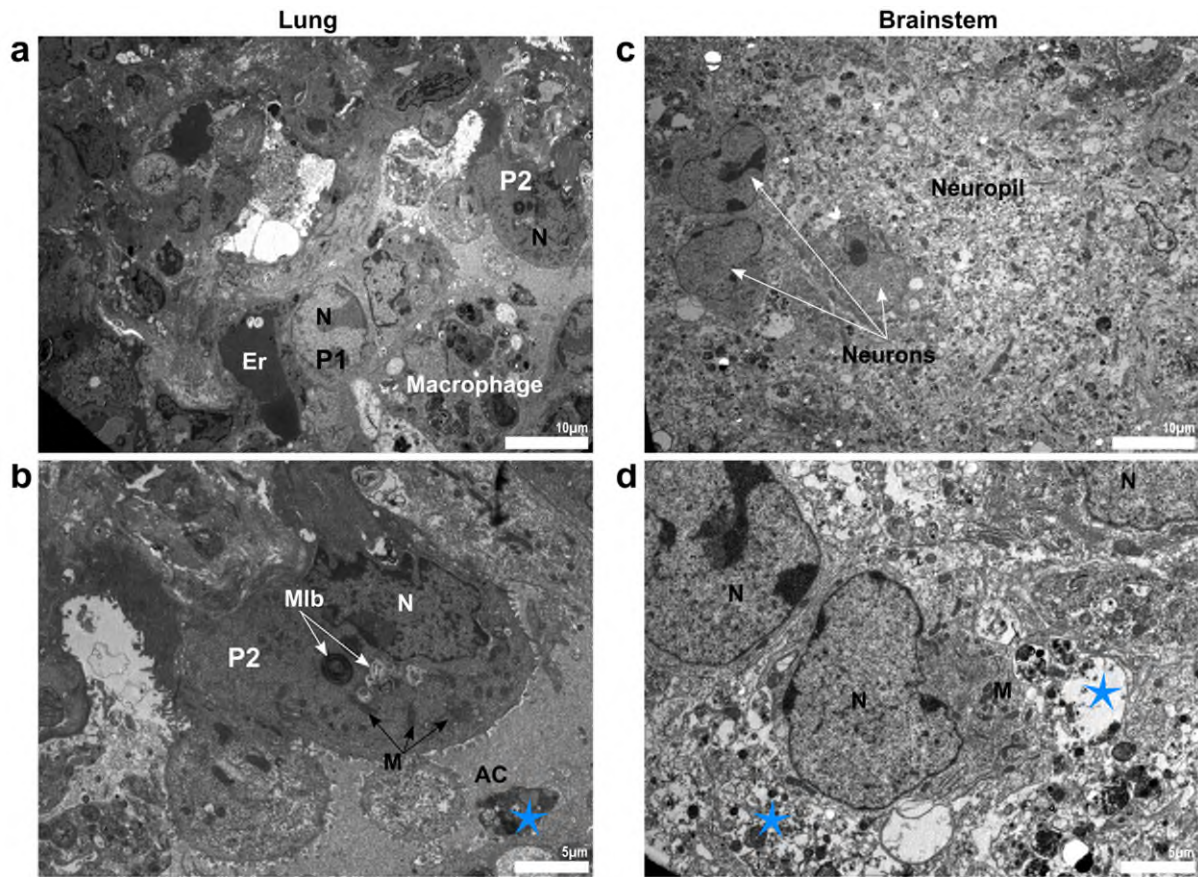

**Supplementary figure 5. Non-infected hamster organotypic lung and brainstem cultures.**

**a,b**, Ultrastructure of non-infected lung organotypic cultures by transmission electron microscopy (TEM) after 1 day of culture. **c,d**, Ultrastructure of non-infected brainstem organotypic cultures TEM after 2 days of culture. P1: type I pneumocyte; P2: type II pneumocyte with numerous mitochondria (M) and Multilamellar bodies (Mlb); AC: alveolar cavity; Er: erythrocyte; N: nucleus; Blue stars: cell debris. All images are representative of 3 independent experiments.

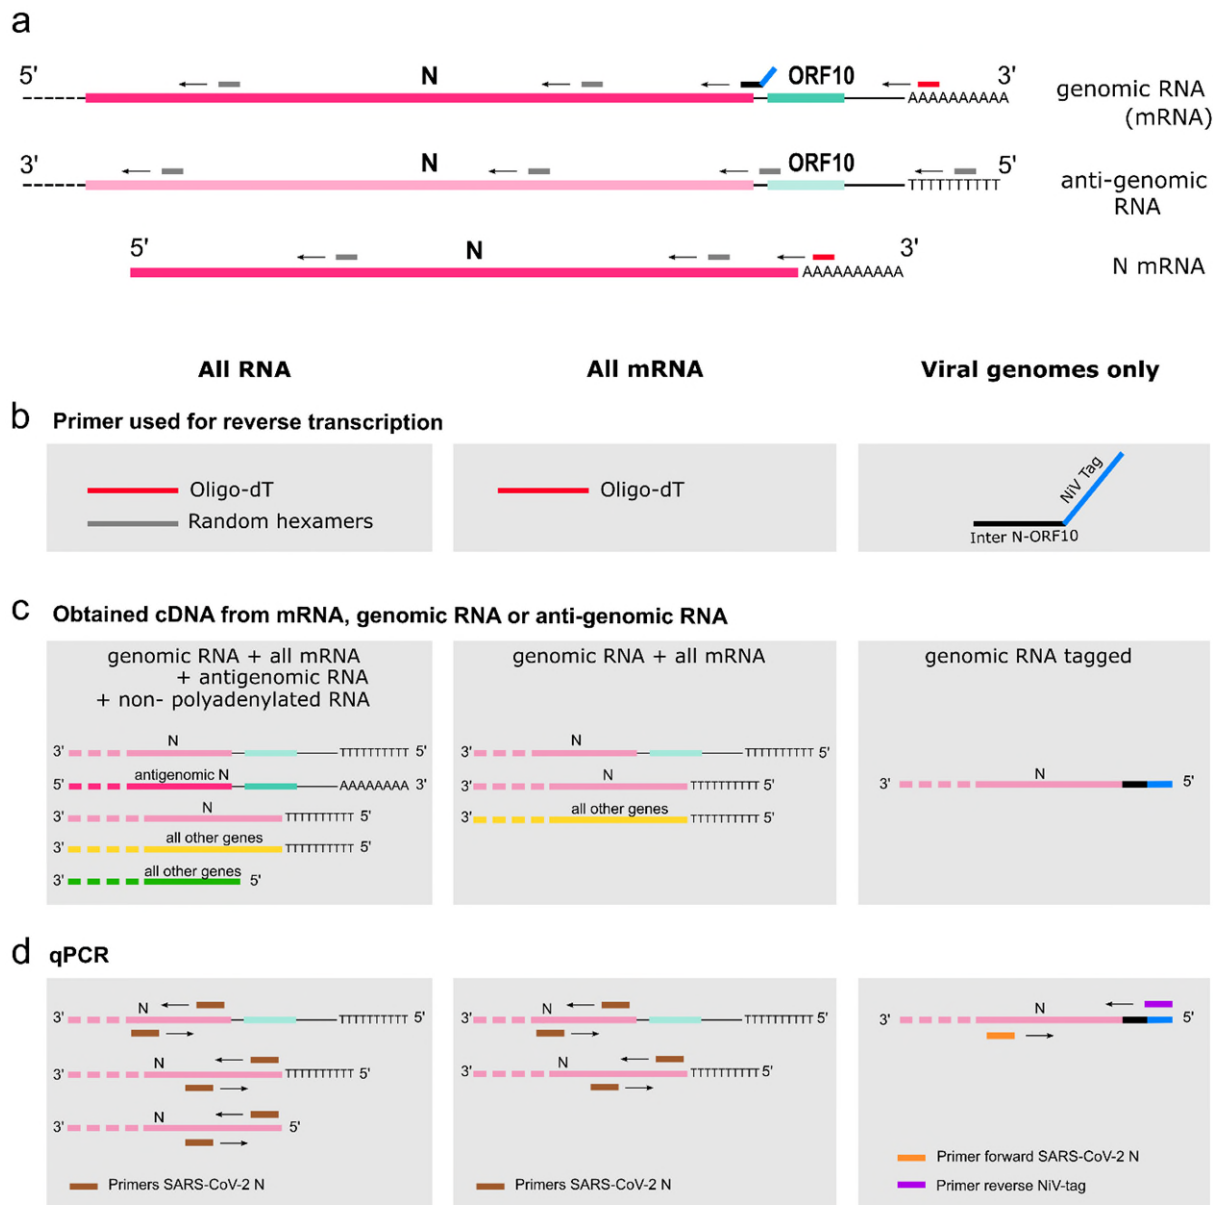

**Supplementary figure 6. Schematic of the products obtained by RT-qPCR depending on the reverse transcription method.**

**a**, Zoom on the extremity of SARS-CoV-2 containing the N genomic and anti-genomic RNA and SARS-CoV-2 N mRNA. **b**, primer used to reverse transcribe respectively all RNA, all mRNA or only the genomic RNA. **c**, Overview of the obtained cDNA after the reverse transcription and **d**, placement of the primer used to amplify SARS-CoV-2 N by qPCR. ORF: open reading frame.

**Supplementary Table 1: Titer of viral stocks used**

| Virus                       | Titer                      |
|-----------------------------|----------------------------|
| BetaCoV/France/IDF0571/2020 | 1.3*10 <sup>6</sup> PFU/ml |
| 2019-nCoV/USA_WA1/2020      | 1*10 <sup>6</sup> PFU/ml   |
| icSARS-CoV-2-mNG            | 1*10 <sup>6</sup> PFU/ml   |
| MeV IC323-EGFP-F L454W      | 5*10 <sup>5</sup> PFU/ml   |
| rNiV-EGFP                   | 4*10 <sup>7</sup> PFU/ml   |

**Supplementary Table 2: Oligonucleotides used for RT-qPCR**

| Gene                        | Primer forward                            | Primer reverse            |
|-----------------------------|-------------------------------------------|---------------------------|
| Hamster_Gapdh               | GCATGGCCTTCCGTGTCC                        | TGTCATCATACTTGGCAGGTTTCT  |
| SARS-CoV-2 genome           | GCAGGGCAATCTCACAATCAGG<br>(NiV extension) | CGCATACAAAACATTCCC        |
| SARS-CoV-2<br>Nucleoprotein | AAACATTCCCACCAACAG                        | CACTGCTCATGGATTGTT        |
| Hamster_MX1                 | CTTCAAGGAGCACCCACACT                      | CTTGCCCTCTGGTGACTCTC      |
| Hamster_TNFa                | TGAGCCATCGTGCCAAATG                       | AGCCCGTCTGCTGGTATCAC      |
| Hamster_IL6                 | GGACAATGACTATGTGTTGTTAGAA                 | AGGCAAATTTCCCAATTGTATCCAG |
| Hamster_CXCL10              | AGACAACAGTAACTCCAGTGACAAG                 | AGTGTAGCACCTCAGCGTAGC     |
| Hamster_IL1b                | TGGACCTTCCAGGATGAGGACA                    | GTTTCATCTCGGAGCCTGTAGTG   |
| Hamster_IL18                | AATGACCCTGGCTGCATTAC                      | CCAGCATGGGGAGAATAAAA      |
| Hamster_Gasdermin D         | AACAGGTGACCACGGAAGAC                      | TGCTGGGTTGGTCATGTAAA      |
| Hamster_MLKL                | ATCAAGTTTTGCTCGGTGCT                      | GTGCCTGTATTCCCAGCATT      |
| Hamster_ISG20               | TGCAGCATTGTGAACCTCAGTG                    | GCAGGATCTCTAGTCTGGCTTC    |
| Hamster_CCL5                | ACTGCCTCGTGTTACATCA                       | CCCCTTCTTCTTTGGGTTG       |
| Hamster_Cathepsin B         | GCTGTAATGGTGGCTATC                        | AGGGAGGTATGGTGTATG        |
| Hamster_Cathepsin L         | TATGAGGCAAAGGATGGA                        | TATAGCGACAGCAATAGGT       |
| Hamster_TMPRSS2             | CTCACTGTGTGGAAGAAC                        | CTTGGTCTCAGAGTTGTAAT      |
| Hamster_ACE2                | TCCATTGGTCTTCTGCCATCCG                    | AGACCATCCACCTCCACTTCTC    |
| Hamster_Neuropilin-1        | ATAAATGTGGAGGGACTATA                      | CTGGAGCTTGGATCAGCCAT      |

**Supplementary Table 3: Antibodies used for Immunofluorescent staining**

| Antibody                                                         | Dilution used | Reference      |
|------------------------------------------------------------------|---------------|----------------|
| Mouse monoclonal anti-NeuN (clone A-60); Merk                    | 1/200         | Cat# MAB377    |
| Mouse monoclonal anti-AQPC (clone D-7); Santa Cruz               | 1/200         | Cat# sc-514022 |
| Mouse monoclonal anti-Myelin Basic Protein [clone MBP101]; Abcam | 1/400         | Cat# ab62631   |

|                                                                           |        |                |
|---------------------------------------------------------------------------|--------|----------------|
| Goat polyclonal anti-iba1; Abcam                                          | 1/200  | Cat# ab48004   |
| Rabbit recombinant anti- SARS-CoV-2 / 2019-nCoV Spike/S2; Sino biological | 1/200  | Cat# 40590-T62 |
| Goat polyclonal anti-GFAP; Abcam                                          | 1/200  | Cat# Ab53554   |
| Mouse monoclonal anti-Tubulin, Acetylated (clone 6-11B-1); Sigma-Aldrich  | 1/1000 | Cat# T6793     |
| Mouse monoclonal anti-SARS-CoV-1/2 S Protein (clone 2B3E5); Sigma-Aldrich | 1/200  | Cat# ZMS1076   |
| Goat polyclonal anti-Olig2; R&D system                                    | 1/200  | Cat#AF2418     |
| Rabbit polyclonal Anti-Prosurfactant Protein C (proSP-C) ; Millipore      | 1/100  | Cat#AB3786     |
| Alexa Fluor™ 488 Goat anti-mouse IgG (H+L); ThermoFisher Scientific       | 1/500  | Cat# A11001    |
| Alexa Fluor™ 488 Donkey anti-rabbit IgG (H+L); ThermoFisher Scientific    | 1/500  | Cat# A21206    |
| Alexa Fluor™ 555 Donkey anti-mouse IgG (H+L); ThermoFisher Scientific     | 1/500  | Cat# A31570    |
| Alexa Fluor™ 555 Donkey anti-rabbit IgG (H+L); ThermoFisher Scientific    | 1/500  | Cat# A31572    |
| Alexa Fluor™ 647 Donkey anti-goat IgG (H+L); ThermoFisher Scientific      | 1/500  | Cat# A21447    |

**Supplementary Table 4: Antibodies used for fluorescence-activated single cell sorting**

| Cell population  | Antibody                                  | Fluorochrome    | Reference                                      | dilution |
|------------------|-------------------------------------------|-----------------|------------------------------------------------|----------|
| Neurons          | Monoclonal Anti-GABA A Receptor           | PE/Atto 594     | Merk / sigma ; SAB5202234-100UG, clone S413-67 | 1/100    |
| Astrocytes       | Anti GLAST (ACSA-1), anti-human/mouse/rat | PE              | Miltenyi ; 130-118-344                         | 1/10     |
| Oligodendrocytes | Clone mGalC Anti-Galactocerebroside       | Alexa fluor 647 | Merk / sigma ; MAB342-AF647                    | 1/100    |
| Microglia        | CD68 Rat-Anti-Mouse                       | BV421           | BD ; 566388                                    | 1/50     |
| Dead cells       | Fixable Viability Dye                     | eFluor™ 780     | Invitrogen™ eBioscience™; 65-0865-14           | 1/500    |
